# Supplementary material
Source: Springer Nature journal article supplement (https://www.springermedizin.de/resource/supplementary/12958_2009_711_MOESM9_ESM.pdf/9568658)

a

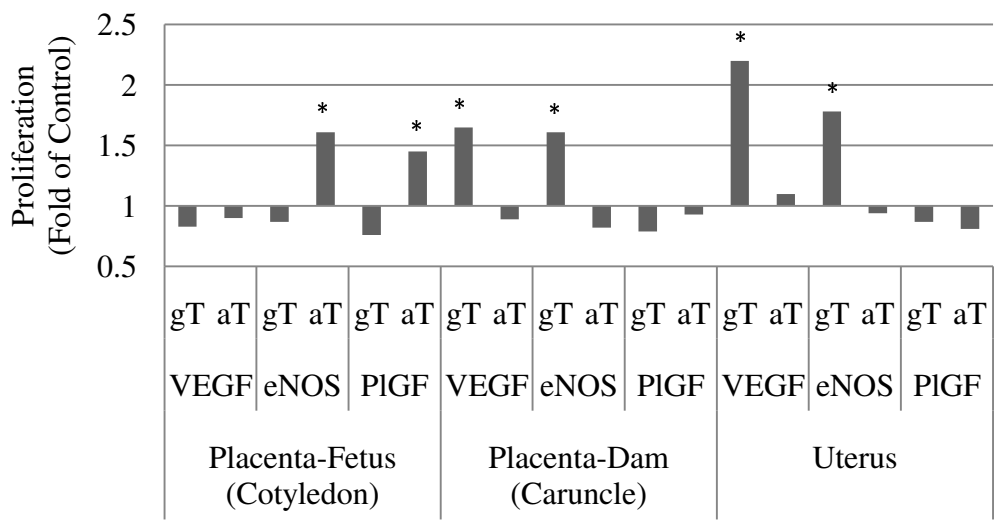

b

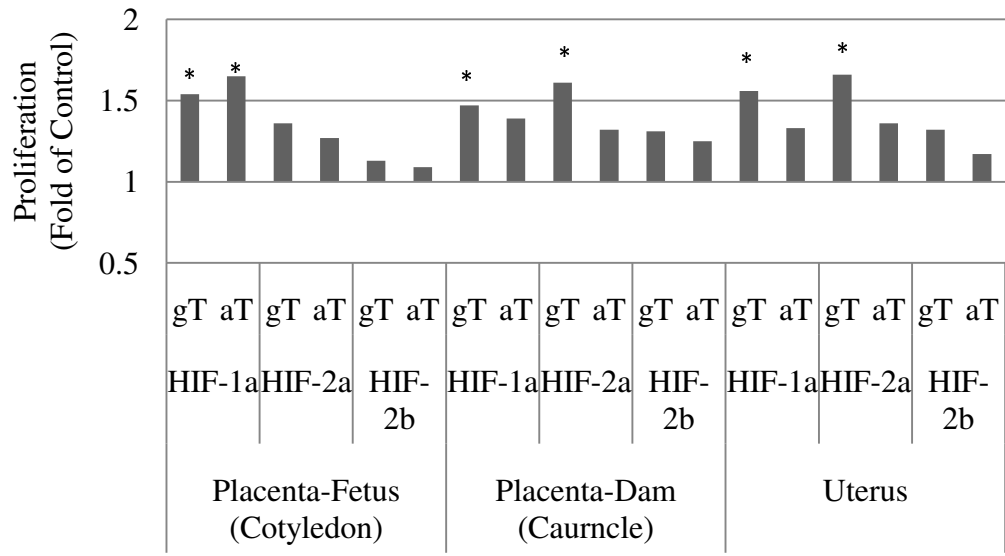

Supplement: MOESM9 [file 9568658]
